# Supplementary material for: The Effect of Carbohydrate Restriction on Lipids, Lipoproteins, and Nuclear Magnetic Resonance-Based Metabolites: CALIBER, a Randomised Parallel Trial
Source: MDPI journal article supplement (doi:10.3390/nu15133002), 2023-06-30
Supplement: s1 [file s1]

**Table S1.** The effect of a LCHF and HCLF diet on markers of cardiovascular disease.

|                                                                | LCHF        |                          |                          |                                   | HCLF         |                          |                           |                                   | <i>p</i> value |              |                |
|----------------------------------------------------------------|-------------|--------------------------|--------------------------|-----------------------------------|--------------|--------------------------|---------------------------|-----------------------------------|----------------|--------------|----------------|
|                                                                | Week 0      | Week 4                   | Week 8                   | 95% CI<br>difference<br>0-8 weeks | Week 0       | Week 4                   | Week 8                    | 95% CI<br>Difference<br>0-8 weeks | Group          | Time         | Time ×<br>Diet |
| <b>VLDL lipids</b>                                             |             |                          |                          |                                   |              |                          |                           |                                   |                |              |                |
| Total lipids in VLDL (mmol/L)                                  | 2.11 ± 0.95 | 1.93 ± 0.90              | 2.06 ± 0.77              | -0.44, 0.35                       | 1.96 ± 0.65  | 2.05 ± 0.59              | 1.94 ± 0.73               | -0.28, 0.25                       | 0.982          | 0.542        | 0.221          |
| Total lipids in chylomicrons and extremely large VLDL (mmol/L) | 0.21 ± 0.22 | 0.11 ± 0.11              | 0.17 ± 0.17              | -0.14, 0.05                       | 0.19 ± 0.11  | 0.15 ± 0.11              | 0.14 ± 0.13               | -0.10, 0.00                       | 0.945          | 0.064        | 0.384          |
| Total lipids in very large VLDL (mmol/L)                       | 0.19 ± 0.14 | 0.15 ± 0.11              | 0.16 ± 0.10              | -0.10, 0.03                       | 0.18 ± 0.09  | 0.18 ± 0.08              | 0.17 ± 0.10               | -0.04, 0.02                       | 0.813          | 0.186        | 0.065          |
| Total lipids in large VLDL (mmol/L)                            | 0.31 ± 0.17 | 0.27 ± 0.17              | 0.27 ± 0.15              | -0.13, 0.05                       | 0.30 ± 0.012 | 0.32 ± 0.12              | 0.31 ± 0.15               | -0.04, 0.06                       | 0.690          | 0.424        | 0.055          |
| Total lipids in medium VLDL (mmol/L)                           | 0.61 (0.34) | 0.60 (0.52)              | 0.61 (0.29)              | -0.10, 0.12                       | 0.60 (0.17)  | 0.67 (0.08)              | 0.63 (0.25)               | -0.05, 0.12                       | 0.339          | 0.578        | 0.562          |
| Total lipids in small VLDL (mmol/L)                            | 0.43 (0.21) | 0.42 (0.30)              | 0.43 (0.19)              | -0.06, 0.07                       | 0.44 (0.10)  | 0.46 (0.09)              | 0.41 (0.16)               | -0.04, 0.05                       | 0.362          | 0.409        | <b>0.034</b>   |
| Total lipids in very small VLDL (mmol/L)                       | 0.39 (0.13) | 0.43 (0.18)              | 0.44 (0.11)              | 0.01, 0.09                        | 0.35 (0.05)  | 0.36 (0.06)              | 0.36 (0.10)               | -0.05, 0.04                       | 0.687          | 0.725        | <b>0.045</b>   |
| <b>IDL lipids</b>                                              |             |                          |                          |                                   |              |                          |                           |                                   |                |              |                |
| Total lipids in IDL (mmol/L)                                   | 1.38 ± 0.26 | 1.51 ± 0.32 <sup>a</sup> | 1.55 ± 0.20 <sup>a</sup> | 0.05, 0.28                        | 1.18 ± 0.28  | 1.31 ± 0.24              | 1.27 ± 0.31               | -0.02, 0.21                       | 0.175          | <b>0.012</b> | 0.548          |
| <b>LDL lipids</b>                                              |             |                          |                          |                                   |              |                          |                           |                                   |                |              |                |
| Total lipids in LDL (mmol/L)                                   | 2.96 ± 0.60 | 3.16 ± 0.70              | 3.12 ± 0.50              | -0.06, 0.38                       | 2.53 ± 0.67  | 2.87 ± 0.61 <sup>a</sup> | 2.81 ± 0.75 <sup>a</sup>  | 0.09, 0.46                        | 0.375          | <b>0.010</b> | 0.663          |
| Total lipids in large LDL (mmol/L)                             | 1.87 ± 0.37 | 2.03 ± 0.43              | 2.01 ± 0.30              | -0.01, 0.28                       | 1.60 ± 0.43  | 1.82 ± 0.39 <sup>a</sup> | 1.78 ± 0.48 <sup>aa</sup> | 0.06, 0.31                        | 0.337          | <b>0.005</b> | 0.861          |
| Total lipids in medium LDL (mmol/L)                            | 0.72 (0.28) | 0.80 (0.33)              | 0.72 (0.23)              | -0.05, 0.08                       | 0.65 (0.14)  | 0.77 (0.14)              | 0.74 (0.18)               | 0.02, 0.11                        | 0.944          | 0.214        | 0.972          |
| Total lipids in small LDL (mmol/L)                             | 0.32 (0.11) | 0.36 (0.12)              | 0.32 (0.07)              | -0.02, 0.04                       | 0.29 (0.05)  | 0.33 (0.05)              | 0.33 (0.07)               | 0.01, 0.04                        | 0.936          | 0.302        | 0.694          |
| <b>HDL lipids</b>                                              |             |                          |                          |                                   |              |                          |                           |                                   |                |              |                |
| Total lipids in HDL (mmol/L)                                   | 2.70 (0.40) | 2.47 (0.99)              | 2.65 (0.43)              | 0.00, 0.00                        | 2.79 (0.97)  | 2.76 (0.63)              | 2.97 (1.03)               | 0.00, 0.00                        | 0.795          | 0.324        | 0.809          |
| Total lipids in very large HDL (mmol/L)                        | 0.14 ± 0.06 | 0.18 ± 0.08              | 0.19 ± 0.11              | -0.03, 0.11                       | 0.14 ± 0.08  | 0.14 ± 0.08              | 0.15 ± 0.09               | -0.03, 0.05                       | 0.601          | 0.156        | <b>0.021</b>   |
| Total lipids in large HDL (mmol/L)                             | 0.41 (0.44) | 0.44 (0.59)              | 0.41 (0.37)              | -0.13, 0.39                       | 0.48 (0.38)  | 0.43 (0.49)              | 0.50 (0.58) <sup>bb</sup> | -0.08, 0.24                       | 0.881          | 0.123        | 0.065          |
| Total lipids in medium HDL (mmol/L)                            | 0.90 (0.11) | 0.82 (0.31)              | 0.91 (0.13)              | -0.14, 0.17                       | 0.98 (0.27)  | 0.94 (0.16)              | 1.03 (0.33)               | -0.04, 0.20                       | 0.521          | 0.424        | 0.915          |
| Total lipids in small HDL (mmol/L)                             | 1.16 ± 0.11 | 1.11 ± 0.11              | 1.13 ± 0.08              | -0.11, 0.03                       | 1.14 ± 0.14  | 1.19 ± 0.16              | 1.20 ± 0.18               | 0.00, 0.12                        | 0.417          | 0.881        | 0.078          |

| Table 1. Lipoprotein concentrations and particle sizes in the plasma of patients with type 2 diabetes mellitus |                 |                 |                            |                |                 |                           |                           |                |          |          |          |          |
|----------------------------------------------------------------------------------------------------------------|-----------------|-----------------|----------------------------|----------------|-----------------|---------------------------|---------------------------|----------------|----------|----------|----------|----------|
| Lipoproteins                                                                                                   |                 | Patients        |                            |                |                 |                           |                           |                |          |          |          |          |
|                                                                                                                | Pre-diabetes    | Diabetes        | Diabetes                   | Diabetes       | Diabetes        | Diabetes                  | Diabetes                  | Diabetes       | Diabetes | Diabetes | Diabetes | Diabetes |
|                                                                                                                | Pre-diabetes    | Diabetes        | Diabetes                   | Diabetes       | Diabetes        | Diabetes                  | Diabetes                  | Diabetes       | Diabetes | Diabetes | Diabetes | Diabetes |
| Total lipoprotein particles (μmol/L)                                                                           |                 |                 |                            |                |                 |                           |                           |                |          |          |          |          |
| Concentration of                                                                                               | 17.01 ± 1.34    | 17.22 ± 2.23    | 17.37 ± 1.97               | -0.86, 1.57    | 16.50 ± 2.27    | 17.49 ± 2.60              | 17.82 ± 3.51              | 0.11, 2.54     | 0.807    | 0.363    | 0.827    |          |
| Average diameter for                                                                                           | 0.94 (0.31)     | 1.10 (0.42)     | 0.99 (0.27)                | -0.01, 0.16    | 0.87 (0.17)     | 0.98 (0.14) <sup>aa</sup> | 0.95 (0.20) <sup>ab</sup> | -0.03, 0.12    | 0.426    | 0.052    | <0.001   |          |
| Concentration of                                                                                               | 1.35 (0.12)     | 1.29 (0.34)     | 1.36 (0.17)                | -0.13, 0.20    | 1.41 (0.34)     | 1.38 (0.18)               | 1.46 (0.37)               | -0.03, 0.22    | 0.697    | 0.410    | 0.993    |          |
| Ratio of apolipoprotein B to apolipoprotein A1                                                                 | 0.71 ± 0.19     | 0.78 ± 0.28     | 0.77 ± 0.22                | -0.05, 0.16    | 0.63 ± 0.16     | 0.66 ± 0.13               | 0.63 ± 0.17               | -0.08, 0.08    | 0.277    | 0.043    | 0.912    |          |
| VLDL particles                                                                                                 |                 |                 |                            |                |                 |                           |                           |                |          |          |          |          |
| Concentration of VLDL particles (μmol/L)                                                                       | 0.15 (0.06)     | 0.16 (0.01)     | 0.15 (0.07)                | -0.12, 0.08    | 0.15 (0.03)     | 0.16 (0.03)               | 0.15 (0.05)               | -0.02, 0.02    | 0.602    | 0.876    | 0.808    |          |
| Average diameter for VLDL particles (nm)                                                                       | 38.79 (1.59)    | 37.84 (2.03)    | 38.22 (1.79)               | -1.42, 0.47    | 38.82 (0.65)    | 38.98 (1.07)              | 39.15 (1.42)              | -0.36, 0.28    | 0.624    | 0.543    | 0.484    |          |
| Concentration of chylomicrons and extremely large VLDL particles (nmol/L)                                      | 1.06 (2.43)     | 0.56 (1.59)     | 1.19 (1.53)                | -1.06, 0.39    | 1.50 (0.71)     | 1.07 (1.16)               | 0.89 (1.71)               | -0.71, 0.01    | 0.862    | 0.077    | 0.280    |          |
| Concentration of very large VLDL particles (nmol/L)                                                            | 3.36 ± 2.40     | 2.56 ± 1.96     | 2.84 ± 1.83                | -0.54, 1.59    | 3.11 ± 1.52     | 3.16 ± 1.37               | 2.96 ± 1.80               | -0.36, 0.66    | 0.818    | 0.190    | 0.055    |          |
| Concentration of large VLDL particles (nmol/L)                                                                 | 9.96 ± 5.86     | 8.28 ± 5.32     | 8.73 ± 4.70                | -3.96, 1.50    | 9.50 ± 3.88     | 10.03 ± 3.68              | 9.58 ± 4.74               | -1.38, 1.55    | 0.711    | 0.374    | 0.050    |          |
| Concentration of medium VLDL particles (nmol/L)                                                                | 38.72 (22.13)   | 40.15 (31.06)   | 40.07 (19.88)              | -3.52, 9.69    | 36.44 (11.84)   | 41.72 (4.63)              | 38.07 (13.21)             | -3.59, 6.96    | 0.592    | 0.787    | 0.679    |          |
| Concentration of small VLDL particles (nmol/L)                                                                 | 40.33 ± 15.00   | 39.03 ± 15.86   | 40.82 ± 11.99              | -5.95, 6.92    | 39.07 ± 11.64   | 40.89 ± 9.75              | 39.34 ± 12.67             | -4.57, 5.11    | 0.933    | 0.611    | 0.459    |          |
| Concentration of very small VLDL particles (nmol/L)                                                            | 56.81 ± 13.66   | 60.01 ± 16.77   | 64.99 ± 11.08 <sup>a</sup> | 2.30, 14.07    | 51.81 ± 11.61   | 54.16 ± 9.83              | 51.10 ± 11.07             | -6.66, 5.23    | 0.297    | 0.319    | 0.064    |          |
| IDL particles                                                                                                  |                 |                 |                            |                |                 |                           |                           |                |          |          |          |          |
| Concentration of IDL particles (nmol/L)                                                                        | 355.66 ± 80.32  | 375.13 ± 98.75  | 398.13 ± 71.49             | 5.75, 79.19    | 304.88 ± 71.55  | 341.87 ± 55.61            | 320.06 ± 69.45            | -22.80, 53.16  | 0.237    | 0.056    | 0.321    |          |
| LDL particles                                                                                                  |                 |                 |                            |                |                 |                           |                           |                |          |          |          |          |
| Concentration of LDL particles (μmol/L)                                                                        | 1.36 (0.45)     | 1.54 (0.56)     | 1.39 (0.35)                | -0.03, 0.22    | 1.26 (0.25)     | 1.40 (0.20)               | 1.36 (0.24)               | -0.01, 0.17    | 0.706    | 0.547    | 0.895    |          |
| Average diameter for LDL particles (nm)                                                                        | 23.95 ± 0.08    | 23.99 ± 0.07    | 23.97 ± 0.06               | -0.03, 0.07    | 23.93 ± 0.10    | 23.96 ± 0.04              | 23.93 ± 0.07              | -0.06, 0.07    | 0.374    | 0.080    | 0.980    |          |
| Concentration of large LDL particles (nmol/L)                                                                  | 856.47 (248.22) | 992.52 (318.87) | 864.58 (183.96)            | -24.73, 155.73 | 796.64 (167.44) | 871.60 (114.85)           | 838.08 (161.00)           | -17.37, 120.74 | 0.576    | 0.470    | 0.992    |          |
| Concentration of medium LDL particles (nmol/L)                                                                 | 325.11 (136.82) | 348.89 (169.21) | 333.86 (122.41)            | -16.27, 47.74  | 315.94 (70.73)  | 340.78 (53.13)            | 348.07 (74.69)            | -9.62, 36.20   | 0.665    | 0.428    | 0.801    |          |
| Concentration of small LDL particles (nmol/L)                                                                  | 181.30 (63.31)  | 198.88 (70.46)  | 187.76 (43.50)             | -4.56, 25.29   | 166.06 (31.30)  | 190.80 (26.94)            | 190.15 (56.30)            | 1.82, 24.24    | 0.693    | 0.791    | 0.964    |          |
| HDL particles                                                                                                  |                 |                 |                            |                |                 |                           |                           |                |          |          |          |          |

|                                                               |              |                            |              |             |              |                           |                           |              |                    |                    |              |
|---------------------------------------------------------------|--------------|----------------------------|--------------|-------------|--------------|---------------------------|---------------------------|--------------|--------------------|--------------------|--------------|
| Concentration of HDL particles (μmol/L)                       | 15.16 (1.44) | 14.80 (2.54)               | 15.14 (1.40) | -1.06, 1.48 | 14.39 (3.06) | 15.75 (2.84)              | 15.53 (4.12)              | 0.03, 2.44   | 0.768 <sup>γ</sup> | 0.964 <sup>γ</sup> | ns           |
| Average diameter for HDL particles (nm)                       | 9.55 ± 0.20  | 9.59 ± 0.24                | 9.62 ± 0.27  | -0.07, 0.21 | 9.58 ± 0.24  | 9.56 ± 0.23               | 9.60 ± 0.24               | -0.07, 0.11  | 0.955              | 0.162              | 0.047        |
| Concentration of very large HDL particles (μmol/L)            | 0.21 ± 0.07  | 0.26 ± 0.09                | 0.26 ± 0.12  | -0.03, 0.13 | 0.21 ± 0.09  | 0.21 ± 0.10               | 0.22 ± 0.10               | -0.03, 0.060 | 0.566              | 0.154              | <b>0.031</b> |
| Concentration of large HDL particles (μmol/L)                 | 0.89 (1.01)  | 0.95 (1.30)                | 0.95 (0.80)  | -0.27, 0.92 | 1.07 (0.96)  | 0.95 (1.22)               | 1.09 (1.37) <sup>bb</sup> | -0.16, 0.57  | 0.918              | 0.105              | <b>0.043</b> |
| Concentration of medium HDL particles (μmol/L)                | 3.40 (0.40)  | 3.06 (1.34)                | 3.39 (0.56)  | -0.51, 0.72 | 3.69 (1.27)  | 3.57 (0.67)               | 3.93 (1.36)               | -0.13, 0.83  | 0.521              | 0.424              | 0.915        |
| Concentration of small HDL particles (μmol/L)                 | 10.20 ± 0.98 | 10.00 ± 0.85               | 9.93 ± 0.74  | -0.81, 0.28 | 9.81 ± 1.33  | 10.47 ± 1.49 <sup>a</sup> | 10.48 ± 1.76 <sup>a</sup> | 0.12, 1.21   | 0.621              | 0.672              | 0.067        |
| <b>Fatty acids, amino acids, and metabolic biomarkers</b>     |              |                            |              |             |              |                           |                           |              |                    |                    |              |
| Phosphoglycerides (mmol/L)                                    | 2.25 ± 0.26  | 2.26 ± 0.31                | 2.34 ± 0.29  | -0.12, 0.30 | 2.15 ± 0.32  | 2.26 ± 0.39               | 2.31 ± 0.50               | -0.05, 0.38  | 0.994              | 0.435              | 0.991        |
| Ratio of triglycerides to phosphoglycerides                   | 0.52 ± 0.22  | 0.44 ± 0.18                | 0.46 ± 0.15  | -0.17, 0.05 | 0.54 ± 0.18  | 0.51 ± 0.13               | 0.50 ± 0.20               | -0.08, 0.01  | 0.607              | 0.088              | 0.169        |
| Total cholines (mmol/L)                                       | 2.56 ± 0.25  | 2.61 ± 0.32                | 2.68 ± 0.29  | -0.09, 0.32 | 2.45 ± 0.34  | 2.59 ± 0.41               | 2.63 ± 0.53               | -0.04, 0.41  | 0.931              | 0.307              | 0.997        |
| Phosphatidylcholines (mmol/L)                                 | 2.05 ± 0.22  | 2.07 ± 0.32                | 2.13 ± 0.28  | -0.10, 0.26 | 1.94 ± 0.31  | 2.08 ± 0.39               | 2.13 ± 0.50               | -0.03, 0.42  | 0.942              | 0.338              | 0.906        |
| Sphingomyelins (mmol/L)                                       | 0.48 ± 0.04  | 0.52 ± 0.04 <sup>aa</sup>  | 0.52 ± 0.05  | 0.00, 0.08  | 0.44 ± 0.07  | 0.47 ± 0.06               | 0.47 ± 0.09               | 0.00, 0.06   | 0.240              | <b>0.007</b>       | 0.285        |
| Total fatty acids (mmol/L)                                    | 12.08 ± 2.57 | 11.78 ± 1.70               | 12.15 ± 1.36 | -1.19, 1.34 | 11.4 ± 2.06  | 11.7 ± 1.93               | 11.82 ± 2.39              | -0.51, 1.33  | 0.876              | 0.871              | 0.686        |
| Degree of unsaturation                                        | 1.35 (0.05)  | 1.39 (0.06)                | 1.38 (0.02)  | 0.00, 0.01  | 1.38 (0.05)  | 1.35 (0.03)               | 1.35 (0.05)               | -0.04, 0.06  | 0.711              | 0.578              | 0.762        |
| Omega-3 fatty acids (mmol/L)                                  | 0.36 (0.11)  | 0.47 (0.07)                | 0.42 (0.10)  | -0.08, 0.20 | 0.38 (0.13)  | 0.44 (0.20)               | 0.53 (0.32)               | -0.03, 0.15  | 0.915              | 0.178              | 0.260        |
| Omega-6 fatty acids (mmol/L)                                  | 4.76 ± 0.67  | 4.73 ± 0.60                | 4.9 ± 0.47   | -0.17, 0.45 | 4.51 ± 0.67  | 4.69 ± 0.69               | 4.76 ± 0.81               | -0.19, 0.68  | 0.810              | 0.546              | 0.769        |
| Polyunsaturated fatty acids (mmol/L)                          | 5.15 ± 0.74  | 5.2 ± 0.61                 | 5.34 ± 0.48  | -0.16, 0.55 | 4.88 ± 0.73  | 5.09 ± 0.76               | 5.19 ± 0.97               | -0.21, 0.82  | 0.776              | 0.421              | 0.886        |
| Monounsaturated fatty acids (mmol/L)                          | 2.91 ± 0.97  | 2.62 ± 0.53                | 2.75 ± 0.43  | -0.65, 0.34 | 2.81 ± 0.78  | 2.79 ± 0.60               | 2.82 ± 0.74               | -0.23, 0.25  | 0.763              | 0.217              | 0.399        |
| Saturated fatty acids (mmol/L)                                | 4.03 ± 0.91  | 3.96 ± 0.61                | 4.06 ± 0.51  | -0.50, 0.57 | 3.71 ± 0.72  | 3.83 ± 0.62               | 3.8 ± 0.77                | -0.17, 0.36  | 0.642              | 0.866              | 0.861        |
| Linoleic acid (mmol/L)                                        | 3.81 ± 0.60  | 3.66 ± 0.59                | 3.81 ± 0.48  | -0.30, 0.32 | 3.49 ± 0.63  | 3.72 ± 0.72               | 3.84 ± 0.84               | -0.13, 0.81  | 0.988              | 0.488              | 0.300        |
| Docosahexaenoic acid (mmol/L)                                 | 0.18 ± 0.03  | 0.25 ± 0.02 <sup>aaa</sup> | 0.23 ± 0.06  | -0.01, 0.11 | 0.19 ± 0.04  | 0.21 ± 0.05               | 0.22 ± 0.07               | -0.01, 0.07  | 0.634              | <b>0.013</b>       | 0.206        |
| Ratio of omega-3 fatty acids to total fatty acids (%)         | 3.19 ± 0.51  | 4.06 ± 0.89                | 3.62 ± 0.90  | -0.56, 1.42 | 3.25 ± 0.58  | 3.42 ± 0.95               | 3.53 ± 0.96               | -0.35, 0.90  | 0.462              | 0.131              | 0.308        |
| Ratio of omega-6 fatty acids to total fatty acids (%)         | 40.01 ± 3.35 | 40.29 ± 1.24               | 40.44 ± 1.60 | -2.49, 3.35 | 39.95 ± 3.84 | 40.2 ± 1.46               | 40.59 ± 2.36              | -0.81, 2.08  | 0.917              | 0.410              | 0.990        |
| Ratio of polyunsaturated fatty acids to total fatty acids (%) | 43.20 ± 3.50 | 44.35 ± 2.00               | 44.05 ± 1.21 | -1.64, 3.35 | 43.21 ± 3.77 | 43.62 ± 1.55              | 44.11 ± 1.85              | -0.86, 2.68  | 0.752              | 0.150              | 0.745        |
| Ratio of monounsaturated fatty acids to total fatty acids (%) | 23.55 ± 2.99 | 22.07 ± 1.56               | 22.56 ± 1.28 | -2.65, 0.66 | 24.28 ± 3.51 | 23.66 ± 2.01              | 23.63 ± 2.63              | -1.41, 0.11  | 0.310              | <b>0.026</b>       | 0.340        |

|                                                                                            |               |                              |                                |             |               |                           |               |             |              |              |                  |
|--------------------------------------------------------------------------------------------|---------------|------------------------------|--------------------------------|-------------|---------------|---------------------------|---------------|-------------|--------------|--------------|------------------|
| Ratio of saturated fatty acids to total fatty acids (%)                                    | 33.00 (1.33)  | 32.96 (1.40)                 | 33.21 (2.09)                   | -1.15, 1.42 | 32.28 (2.09)  | 32.62 (0.77) <sup>a</sup> | 32.77 (1.64)  | -1.45, 0.93 | 0.692        | <b>0.044</b> | 0.101            |
| Ratio of linoleic acid to total fatty acids (%)                                            | 31.88 ± 2.61  | 31.03 ± 1.78                 | 31.42 ± 2.40                   | -3.24, 2.31 | 30.78 ± 2.99  | 31.65 ± 1.78              | 32.43 ± 2.01  | -0.10, 3.40 | 0.849        | 0.366        | 0.392            |
| Ratio of docosahexaenoic acid to total fatty acids (%)                                     | 1.44 (0.67)   | 1.94 (0.53) <sup>aa</sup>    | 1.71 (0.74)                    | -0.14, 0.80 | 1.62 (0.54)   | 1.86 (0.67)               | 1.91 (0.25)   | -0.15, 0.44 | 0.822        | <b>0.005</b> | 0.080            |
| Ratio of polyunsaturated fatty acids to monounsaturated fatty acids                        | 1.88 ± 0.38   | 2.02 ± 0.23                  | 1.96 ± 0.13                    | -0.13, 0.30 | 1.83 ± 0.41   | 1.86 ± 0.23               | 1.89 ± 0.28   | -0.04, 0.17 | 0.446        | 0.086        | 0.340            |
| Ratio of omega-6 fatty acids to omega-3 fatty acids                                        | 12.89 (2.42)  | 10.31 (2.15)                 | 12.70 (3.78)                   | -4.56, 2.58 | 11.68 (2.79)  | 11.62 (4.22)              | 9.95 (6.47)   | -2.27, 1.96 | 0.514        | 0.280        | 0.306            |
| Alanine (mmol/L)                                                                           | 0.33 ± 0.06   | 0.29 ± 0.07                  | 0.30 ± 0.05                    | -0.09, 0.04 | 0.37 ± 0.07   | 0.37 ± 0.12               | 0.38 ± 0.13   | -0.07, 0.10 | 0.094        | 0.474        | 0.314            |
| Glutamine (mmol/L)                                                                         | 0.60 ± 0.05   | 0.52 ± 0.07 <sup>aa *</sup>  | 0.58 ± 0.07                    | -0.09, 0.06 | 0.64 ± 0.06   | 0.62 ± 0.07               | 0.65 ± 0.06   | -0.05, 0.07 | <b>0.016</b> | <b>0.031</b> | 0.203            |
| Glycine (mmol/L)                                                                           | 0.17 ± 0.06   | 0.17 ± 0.05                  | 0.17 ± 0.04                    | -0.04, 0.04 | 0.19 ± 0.05   | 0.19 ± 0.05               | 80.22 ± 0.09  | -0.02, 0.08 | 0.239        | 0.137        | 0.730            |
| Histidine (mmol/L)                                                                         | 0.07 ± 0.01   | 0.07 ± 0.01                  | 0.07 ± 0.01 <sup>aa</sup>      | -0.01, 0.00 | 0.07 ± 0.01   | 0.07 ± 0.01               | 0.08 ± 0.01   | 0.00, 0.02  | 0.190        | 0.735        | 0.070            |
| Total concentration of branched-chain amino acids (leucine + isoleucine + valine) (mmol/L) | 0.42 ± 0.08   | 0.45 ± 0.05 <sup>*</sup>     | 0.47 ± 0.08 <sup>*</sup>       | -0.05, 0.15 | 0.39 ± 0.05   | 0.38 ± 0.05               | 0.38 ± 0.04   | -0.02, 0.02 | <b>0.022</b> | 0.444        | 0.445            |
| Isoleucine (mmol/L)                                                                        | 0.06 ± 0.02   | 0.06 ± 0.01                  | 0.07 ± 0.02                    | -0.02, 0.04 | 0.06 ± 0.01   | 0.06 ± 0.01               | 0.05 ± 0.01   | -0.01, 0.01 | 0.077        | 0.575        | 0.517            |
| Leucine (mmol/L)                                                                           | 0.12 ± 0.02   | 0.13 ± 0.02                  | 0.14 ± 0.03                    | -0.02, 0.05 | 0.11 ± 0.02   | 0.11 ± 0.02               | 0.11 ± 0.02   | -0.01, 0.01 | 0.103        | 0.449        | 0.600            |
| Valine (mmol/L)                                                                            | 0.23 ± 0.04   | 0.26 ± 0.04 <sup>*</sup>     | 0.26 ± 0.02 <sup>**</sup>      | -0.02, 0.07 | 0.22 ± 0.03   | 0.21 ± 0.02               | 0.22 ± 0.02   | -0.02, 0.02 | <b>0.011</b> | 0.422        | 0.278            |
| Phenylalanine (mmol/L)                                                                     | 0.05 ± 0.01   | 0.05 ± 0.01                  | 0.05 ± 0.01                    | -0.01, 0.00 | 0.05 ± 0.01   | 0.05 ± 0.01               | 0.05 ± 0.01   | 0.00, 0.01  | 0.263        | 0.334        | 0.088            |
| Tyrosine (mmol/L)                                                                          | 0.07 ± 0.01   | 0.06 ± 0.02 <sup>aa</sup>    | 0.06 ± 0.01 <sup>a</sup>       | -0.02, 0.00 | 0.07 ± 0.01   | 0.06 ± 0.01               | 0.06 ± 0.01   | -0.01, 0.00 | 0.435        | <b>0.001</b> | 0.051            |
| Glucose (mmol/L)                                                                           | 5.45 ± 0.42   | 5.37 ± 0.52                  | 5.37 ± 0.56                    | -0.39, 0.23 | 5.5 ± 0.31    | 5.45 ± 0.64               | 5.50 ± 0.63   | -0.43, 0.42 | 0.748        | 0.901        | 0.544            |
| Lactate (mmol/L)                                                                           | 2.83 (3.73)   | 2.41 (2.47)                  | 1.06 (1.27)                    | -2.81, 0.78 | 1.77 (4.01)   | 2.10 (3.34)               | 3.76 (4.47)   | -2.51, 5.42 | 0.467        | 0.897        | 0.323            |
| Pyruvate (mmol/L)                                                                          | 0.08 ± 0.04   | 0.09 ± 0.04                  | 0.06 ± 0.03                    | -0.06, 0.02 | 0.09 ± 0.06   | 0.11 ± 0.07               | 0.11 ± 0.05   | -0.04, 0.07 | 0.194        | 0.688        | 0.554            |
| Citrate (mmol/L)                                                                           | 0.07 ± 0.02   | 0.08 ± 0.02 <sup>aa *</sup>  | 0.09 ± 0.01 <sup>aaa **</sup>  | 0.01, 0.03  | 0.07 ± 0.01   | 0.07 ± 0.01               | 0.07 ± 0.01   | -0.02, 0.00 | 0.080        | 0.041        | <b>&lt;0.001</b> |
| 3-Hydroxybutyrate (mmol/L)                                                                 | 0.07 (0.02)   | 0.32 (0.42) <sup>aa **</sup> | 0.13 (0.18) <sup>bb *</sup>    | -0.06, 0.24 | 0.08 (0.07)   | 0.07 (0.07)               | 0.06 (0.04)   | -0.06, 0.03 | <b>0.012</b> | <b>0.020</b> | <b>0.018</b>     |
| Acetate (mmol/L)                                                                           | 0.04 (0.02)   | 0.05 (0.01)                  | 0.06 (0.04)                    | -0.06, 0.16 | 0.06 (0.03)   | 0.05 (0.02)               | 0.05 (0.01)   | -0.03, 0.01 | 0.516        | 0.827        | 0.177            |
| Acetoacetate (mmol/L)                                                                      | 0.01 (0.01)   | 0.06 (0.08) <sup>aa **</sup> | 0.03 (0.03) <sup>bb</sup>      | -0.02, 0.04 | 0.01 (0.01)   | 0.01 (0.03)               | 0.02 (0.02)   | -0.01, 0.02 | <b>0.031</b> | 0.193        | <b>0.013</b>     |
| Acetone (mmol/L)                                                                           | 0.03 (0.01)   | 0.08 (0.07)                  | 0.07 (0.06) <sup>aaa ***</sup> | 0.01, 0.11  | 0.02 (0.01)   | 0.03 (0.02)               | 0.02 (0.01)   | -0.02, 0.00 | <b>0.021</b> | <b>0.017</b> | <b>0.001</b>     |
| Creatinine (μmol/L)                                                                        | 76.28 ± 10.62 | 73.03 ± 10.48 <sup>a</sup>   | 79.12 ± 11.35 <sup>*</sup>     | -1.96, 7.65 | 80.12 ± 13.00 | 77.17 ± 12.81             | 78.09 ± 15.26 | -7.18, 3.11 | 0.660        | 0.253        | 0.646            |
| Albumin (g/L)                                                                              | 42.11 ± 2.68  | 43.44 ± 2.82 <sup>a</sup>    | 44.05 ± 1.93 <sup>a</sup>      | 0.15, 3.74  | 44.91 ± 1.66  | 45.49 ± 1.13              | 45.44 ± 2.05  | -1.41, 2.47 | 0.057        | <b>0.032</b> | 0.152            |
| Glycoprotein acetyls (mmol/L)                                                              | 0.79 ± 0.11   | 0.75 ± 0.08                  | 0.76 ± 0.08                    | -0.07, 0.02 | 0.75 ± 0.08   | 0.74 ± 0.07               | 0.75 ± 0.08   | -0.05, 0.05 | 0.625        | 0.132        | 0.222            |

Values are expressed as means ± SD or median (interquartile range) of n=8 LCHF & n=8 HCLF. <sup>a</sup>  $p < 0.05$ , <sup>aa</sup>  $P < 0.01$ , <sup>aaa</sup>  $p < 0.001$ , denotes significant difference to week 0; <sup>b</sup>  $p < 0.05$ , <sup>bb</sup>  $p < 0.01$ , denotes significant difference to week 4, <sup>\*</sup>  $p < 0.05$ , <sup>\*\*</sup>  $p < 0.01$  denotes significant difference between groups at that timepoint. <sup>‡</sup> non-parametric (Friedman test) analysis for the effect of time. ns indicates there were no significant differences between groups at any time point by non-parametric test (Kruskal–Wallis test). Bold writing highlights significant results ( $p < 0.05$ ). CI, Confidence interval; HCLF, high carbohydrate low fat; LCHF, low carbohydrate high fat.
